# Supplementary material for: Hybridized local and charge-transfer materials using pyrene as π-bridge towards negligible efficiency roll-off in non-doped OLED
Source: Royal Society of Chemistry journal article supplement (doi:10.1039/d5sc01756d), 2025-01-01
Supplement: d5sc01756d1.pdf [file d5sc01756d1.pdf]

## Supporting information

### Hybrid Local and Charge Transfer Emitters Using Pyrene as $\pi$ - Bridge Towards Negligible Efficiency Roll-Off Non-doped OLED

Du yuqin <sup>a</sup>, Peng Yali <sup>a</sup>, Dong Wenjian<sup>a</sup>, Xu Huixia<sup>a\*</sup>, Li Xinyu<sup>a</sup>, Chen Kang<sup>a</sup>, Wang  
Feng<sup>a</sup>, Miao Yanqin<sup>a, b\*</sup>, Tao Peng<sup>c\*</sup>, Wang Hua <sup>a</sup>, Yu Junsheng<sup>d</sup>

<sup>a</sup> Key Laboratory of Interface Science and Engineering in Advanced Materials,  
Ministry of Education, Taiyuan University of Technology, Taiyuan 030024, China

<sup>b</sup> College of Physics and Optoelectronics, Taiyuan University of Technology, Taiyuan,  
030024, China

<sup>c</sup> Department of Applied Biology and Chemical Technology and Research Institute  
for Smart Energy, The Hong Kong Polytechnic University, Hong Kong 999077, P. R.  
China

<sup>d</sup> State Key Laboratory of Electronic Thin Films and Integrated Devices, School of  
Optoelectronic Science and Engineering, University of Electronic Science and  
Technology of China (UESTC), Chengdu, 610054, China

Email: [xuhuixia@tyut.edu.cn](mailto:xuhuixia@tyut.edu.cn) (Xu Huixia); [miaoyanqin@tyut.edu.cn](mailto:miaoyanqin@tyut.edu.cn) (Miao Yanqin);  
[pengtao@polyu.edu.hk](mailto:pengtao@polyu.edu.hk) (Tao Peng)

## General methods

**Molecular Structure Characterization:**  $^1\text{H}$  and  $^{13}\text{C}$  nuclear magnetic resonance (NMR) spectra were recorded in chloroform-*d* ( $\text{CDCl}_3$ ) as the solvent on the Switzerland Bruker and tetramethylsilane (TMS,  $\delta=0.00$  ppm) as the internal standard. High-resolution electrospray molecular mass spectra was determined by Bruker Ultraflex extreme MALDI-TOF mass spectrometer.

**Single Crystal Testing and Analysis:** Single crystals were obtained via a mixed solvent evaporation method. Single crystal data were collected using a Bruker D8 Venture X-ray single crystal diffraction system, employing a copper ( $\text{CuK}\alpha$ ,  $\lambda = 1.54184$ ) source at a voltage of 50 kV and a current of 0.8 mA. The diffraction angle was set from  $8^\circ$  to  $140^\circ$ , and the temperature was maintained at 295 K. The single crystal structure was analyzed using Mercury software.

**Theoretical Calculations:** The ground state structures were optimized using density functional theory (DFT) with the B3LYP and the 6-31G(d) basis set. The excited states natures were calculated using time-dependent density functional theory (TD-DFT) at the B3LYP/6-31G(d) and DEF2VP levels. These calculations were performed using Gaussian09 software. The spin-orbit coupling (SOC) of the compound was calculated using ORCA software.

**Thermal Stability Testing:** Thermal stability was measured using a NETZSCH STA449 simultaneous thermal analyzer. The compound was heated from room temperature to  $600^\circ\text{C}$  at a rate of  $10^\circ\text{C}/\text{min}$  under a nitrogen atmosphere to obtain the thermal weight loss curve (Thermal Gravimetry Analysis, TGA). The decomposition temperature ( $T_d$ ) was determined at the temperature when the mass loss reached 5% of initial weight. Additionally, Differential scanning calorimetry (DSC) were carried out on NETZSCH DSC 200 PC instrument. The sample was heated from room temperature to  $300^\circ\text{C}$  at a rate of  $10^\circ\text{C}/\text{min}$ , maintaining this temperature for 3 minutes, and then

rapidly cooling to room temperature. After, the sample was reheated to 300 °C at the same rate. The curve obtained during the second heating was the differential scanning calorimetry curve (DSC) to obtain the glass-transition temperature.

**Electrochemical Characteristics Testing:** The electrochemical properties were investigated using a CHI 660E electrochemical workstation to obtain the cyclic voltammograms. A three-electrode system consisting of a glassy carbon electrode (as the working electrode), a platinum wire electrode (as the auxiliary electrode), and a saturated calomel electrode (as the reference electrode) were employed. The electrolyte was a 0.1 mol/L tetrabutylammonium perchlorate solution in acetonitrile. Ferrocene/ferrocenium ( $\text{Fc}^+/\text{Fc}$ ) was used as an internal standard. The compound was dissolved in dichloromethane at a concentration of  $1 \times 10^{-5}$  mol/L and mixed with the electrolyte for testing. Parameters such as the oxidation onset potential of the compound and the onset position of the absorption peak in dichloromethane solution were used to calculate the energy levels of the highest occupied molecular orbital (HOMO) and lowest unoccupied molecular orbital (LUMO).

$$E_{HOMO} = -4.8 - (E_c^{OX} - E_f^{OX}) \text{eV} \quad (1)$$

$$E_{LUMO} = E_{HOMO} + E_g \quad (2)$$

$$E_g = \frac{1240}{\lambda} \quad (3)$$

In the above formula, the onset oxidation potential of the materials is represented by  $E_c^{OX}$ , while the oxidation potential of ferrocene is denoted as  $E_f^{OX}$ .  $E_g$  corresponds to the energy gap, and  $\lambda$  represents the wavelength corresponding to onset position of the absorption peak.

**Photophysical properties:** The UV-visible (UV-Vis) absorption spectra, photoluminescence (PL) spectra, and transient photoluminescence spectra along with the photoluminescence quantum yield (PLQY) were characterized using a Hitachi U-3900 UV spectrophotometer, a Fluoromax-4700

fluorescence spectrometer, and an Edinburgh FLS 980 transient fluorescence spectrometer, respectively.

The  $S_1$  energy level of **TPAPyCP/2mTPAPyCP** was determined from emission maximum peaks in 2-MeTHF solution at 77 K without any delay.  $T_1$  energy level was calculated using the phosphorescence spectra of PtOEP & **TPAPyCP/2mTPAPyCP** at 77 K in 2-MeTHF with 5 ms delay, in which PtOEP was employed as sensitizer. The  $T_1$  states of TPAPyCP/2mTPAPyCP were sensitized by phosphorescent dye PtOEP with a low  $E_{T1}$  (1.91 eV). There are new emission peaks at 716 (1.73 eV) and 704 nm (1.76 eV) in the delayed phosphorescent spectra (Figure 5) with 5 ms delay, and were attributed to the  $T_1$  states of TPAPyCP/2mTPAPyCP.

**Calculation of rate constants:** The performance parameters of the materials were calculated using the following equations.

$$\Phi_p = \Phi_{PL} \times R_p; \quad \Phi_d = \Phi_{PL} \times R_d \quad (4)$$

$$k_r = \Phi_p / \tau_p; \quad k_{nr} = (1 - \Phi_{PL}) / \tau_p \quad (5)$$

$$\Phi_{PL} = k_r / (k_r + k_{IC}) \quad (6)$$

$$\Phi_p = k_r / (k_r + k_{IC} + k_{ISC}) \quad (7)$$

$$k_{hRISC} = (k_p \times k_d \times \Phi_d) / (k_{ISC} \times \Phi_d) \quad (8)$$

$$k_p = 1 / \tau_p; \quad k_d = 1 / \tau_d \quad (9)$$

$\Phi_{PL}$  denotes PLQY, while  $\Phi_p$  and  $\Phi_d$  represent the components of prompt and delayed fluorescence, respectively.  $R_p$  and  $R_d$  are the proportions of prompt and delayed fluorescence components;  $\tau_p$  and  $\tau_d$  are the lifetimes of prompt and delayed fluorescence.  $k_r$  and  $k_{nr}$  are the radiative and non-radiative transition rate constants, respectively.  $k_{IC}$  refers to the internal conversion rate constant,  $k_{ISC}$  is the intersystem crossing rate constant, and  $k_{hRISC}$  is the reverse intersystem crossing rate constant.

**Solvatochromic Effects:** The absorption and emission spectra of the materials were tested in solvents with varying polarities. The Stokes shift in different solvents was calculated, and the relationship between Stokes shift ( $\nu_a - \nu_f$ ) and solvent polarity ( $\Delta f$ ) was fitted. Additionally, the molecular excited-state dipole moment  $\mu_e$  was calculated based on the Lippert-Mataga equation.

$$hc(\nu_a - \nu_f) = hc(\nu_a^0 - \nu_f^0) + \frac{2(\mu_e - \mu_g)^2}{\alpha_0^3} f(\varepsilon, n) \quad (10)$$

The dielectric constant ( $\varepsilon$ ), solvent refractive index ( $n$ ), excited-state dipole moment ( $\mu_e$ ), and ground-state dipole moment ( $\mu_g$ ) are defined, while  $\alpha_0$  represents the Onsager radius.  $h$  and  $c$  denote Planck's constant and the speed of light in vacuum, respectively.

**Preparation and Characterization of OLED Devices:** Organic light-emitting diodes (OLEDs) with an area of  $3 \times 3 \text{ mm}^2$  were fabricated on indium tin oxide (ITO) glass substrates using a vacuum deposition method. Prior to fabrication, the ITO glass substrates were sequentially cleaned with deionized water, acetone, and isopropanol. After cleaning, the substrates were dried with nitrogen gas and placed in an oven at  $120^\circ\text{C}$  for further drying. The organic layers were deposited at a rate of  $0.1 \text{ nm/s}$  within a high vacuum chamber under inert gas glovebox conditions, maintaining a pressure below  $5.0 \times 10^{-4} \text{ Pa}$ . The thickness of the deposited films was monitored using a quartz crystal oscillator.

**The electroluminescence spectra and CIE coordinates:** These data were characterized using a PR-655 spectrophotometer. The current density-voltage-brightness ( $J-V-L$ ) characteristics of the OLEDs were measured using a Keithley 2400 source meter integrated with a BM-70A light source, controlled by a computer. The external quantum efficiency  $EQE$  was calculated from the  $J-V-L$  curves and spectral data. All devices were characterized at room temperature without packaging.

**Exciton utilization efficiency (EUE) of OLED devices:**  $EUE$  can be calculated using Equation :

$$EQE = \gamma \times \Phi_{PL} \times EUE \times \eta_{out} \quad (11)$$

where  $\gamma$  is the exciton recombination rate, which is taken as 100% in this study,  $\Phi_{PL}$  refers to the absolute photoluminescence quantum yield of the emitting layer material, and  $\eta_{out}$  is the device's external coupling efficiency, assumed to be 20% in this work.

## Experimental section

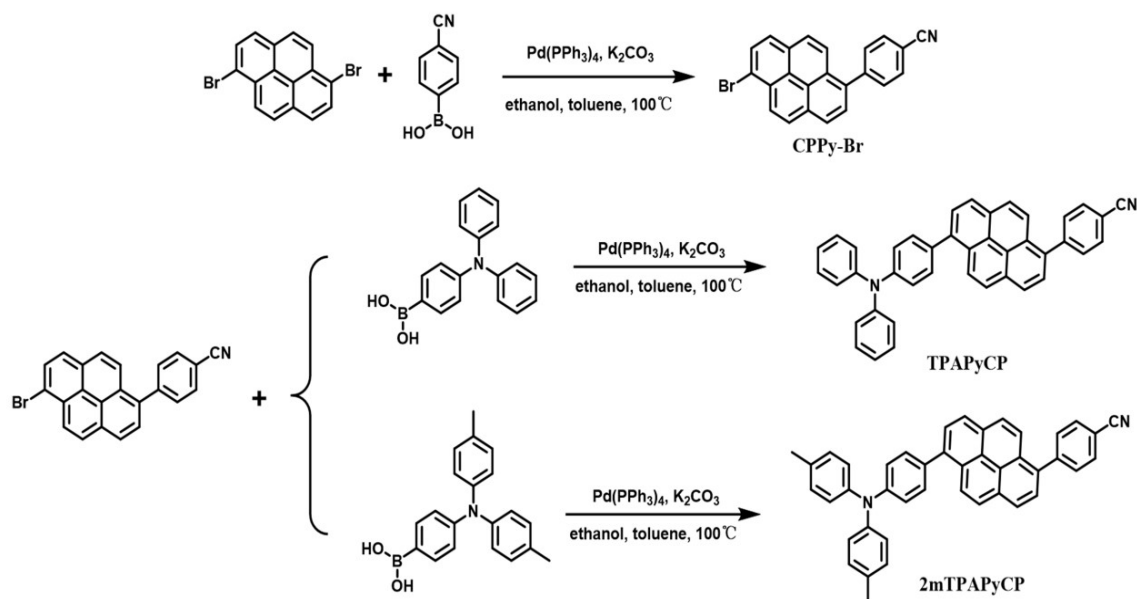

Scheme S1. Synthetic route of **TPAPyCP** and **2mTPAPyCP**

### Synthesis of Intermediate CPPy-Br

1,6-Dibromopyrene (720.1 mg, 2 mmol), 4-cyanophenylboronic acid (264.6 mg, 1.8 mmol), and tetrakis(triphenylphosphine)palladium (200 mg, 0.17 mmol) were dissolved in a mixture of 10 mL (2 M) potassium carbonate solution, 20 mL toluene, and 20 mL ethanol. The reaction mixture was heated to reflux in the nitrogen atmosphere for 24 h. After cooling to room temperature, the crude product was extracted with dichloromethane (DCM) and water. The organic phase was collected and dried, then purified by column chromatography using petroleum ether (PE)/DCM (4:1, v/v) as the eluent. The product was recrystallized from DCM to yield a pale yellow solid powder (543 mg, 79% yield).  $^1\text{H}$  NMR (400 MHz, Chloroform-*d*):  $\delta$  8.39 (d,  $J = 9.2$  Hz, 1H), 8.17 (dd,  $J = 8.0, 5.2$  Hz, 2H), 8.09 (d,  $J = 9.2$  Hz, 1H), 7.95 (d,  $J = 9.2$  Hz, 1H), 7.94-7.86 (m, 2H), 7.86 (d,  $J = 7.9$  Hz, 1H), 7.81-

7.73 (m, 2H), 7.68-7.60 (m, 2H).

### Synthesis of Target Molecule TPAPyCP

The intermediate CPPy-Br (382 mg, 1 mmol), 4-(diphenylamino)phenylboronic acid (260.2 mg, 0.9 mmol), and tetrakis(triphenylphosphine)palladium ( $\text{Pd}(\text{PPh}_3)_4$ ) (100 mg, 0.09 mmol) were dissolved in a mixture of 10 mL (2 M)  $\text{K}_2\text{CO}_3$  solution, 20 mL toluene, and 10 mL ethanol. The mixture was heated under reflux in a nitrogen atmosphere for 24 h. After cooling to room temperature, the crude product was extracted with DCM and water. The organic phase was collected and dried, then purified by column chromatography using PE/DCM (4:1, v/v) as the eluent. The final product was recrystallized from DCM to yield a yellow-green solid powder (399 mg, 81% yield).  $^1\text{H}$  NMR (400 MHz, Chloroform-*d*):  $\delta$  8.35 (d,  $J$  = 9.2 Hz, 1H), 8.21 (dd,  $J$  = 7.9, 2.1 Hz, 2H), 8.11-7.97 (m, 4H), 7.92 (d,  $J$  = 7.9 Hz, 1H), 7.85 (d,  $J$  = 8.2 Hz, 2H), 7.79-7.70 (m, 2H), 7.50 (d,  $J$  = 8.4 Hz, 2H), 7.38-7.29 (m, 4H), 7.25 (t,  $J$  = 8.7 Hz, 6H), 7.13-7.02 (m, 2H).  $^{13}\text{C}$  NMR (101 MHz, Chloroform-*d*):  $\delta$  147.74, 147.27, 146.29, 138.21, 135.34, 134.77, 132.22, 131.40, 131.36, 131.24, 130.04, 129.41, 128.31, 128.10, 127.33, 127.21, 126.17, 125.03, 124.70, 124.51, 124.09, 123.23, 123.17, 119.00, 111.10. HRMS (FAB<sup>+</sup>,  $m/z$ ): calcd for  $\text{C}_{46}\text{H}_{36}\text{N}_2$ , 546.217; found 546.235.

### Synthesis of 2mTPAPyCP

The synthesis process for 2mTPAPyCP was similar with that of TPAPyCP. The final product was a yellow-green powder solid with a yield of 78%.  $^1\text{H}$  NMR (400 MHz, Chloroform-*d*):  $\delta$  8.35 (d,  $J$  = 9.3 Hz, 1H), 8.20 (d,  $J$  = 7.8 Hz, 2H), 8.11-7.99 (m, 4H), 7.91 (d,  $J$  = 7.8 Hz, 1H), 7.85 (d,  $J$  = 7.9 Hz, 2H), 7.74 (d,  $J$  = 7.8 Hz, 2H), 7.46 (d,  $J$  = 8.3 Hz, 2H), 7.27-7.07 (m, 10H), 2.35 (s, 6H).  $^{13}\text{C}$  NMR (101 MHz, Chloroform-*d*):  $\delta$  147.68, 146.32, 145.27, 138.40, 133.73, 132.88, 132.22, 131.36,



131.25, 130.03, 129.95, 128.68, 128.32, 128.12, 127.30, 127.12, 126.27, 125.20, 125.02, 124.99, 124.45, 124.01, 121.93, 119.01, 111.08, 20.89. HRMS (FAB+, m/z): Calcd for C<sub>45</sub>H<sub>30</sub>N<sub>2</sub>, 574.240; found 574.239.

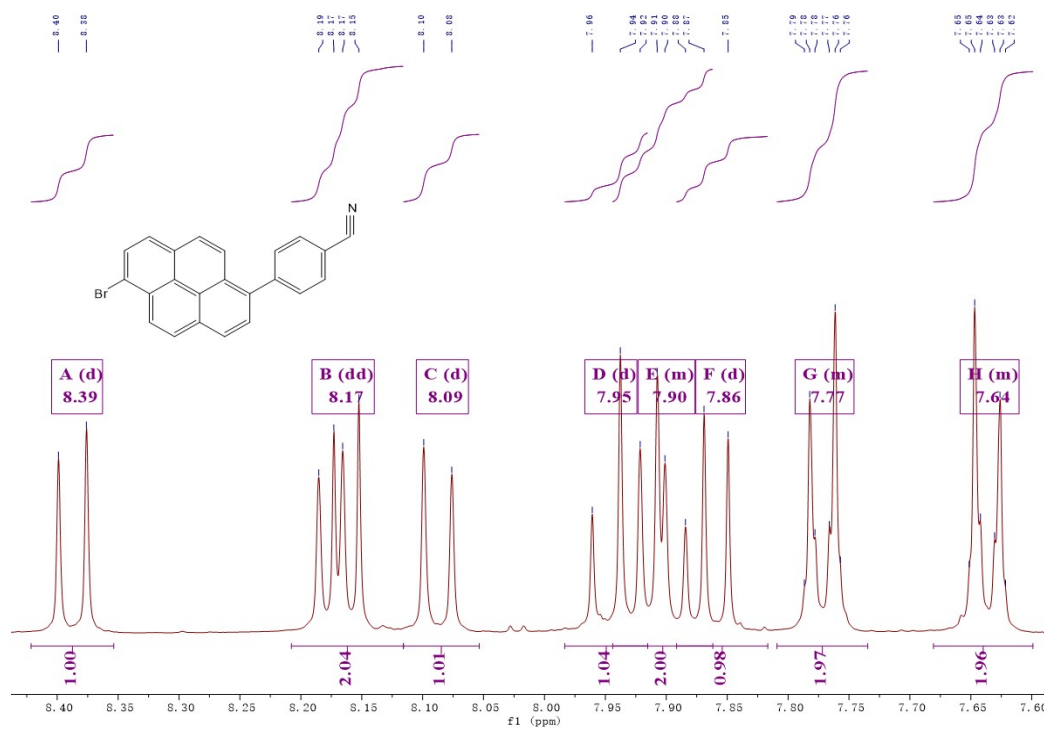

**Figure S1** <sup>1</sup>H NMR spectra of CPPy-Br

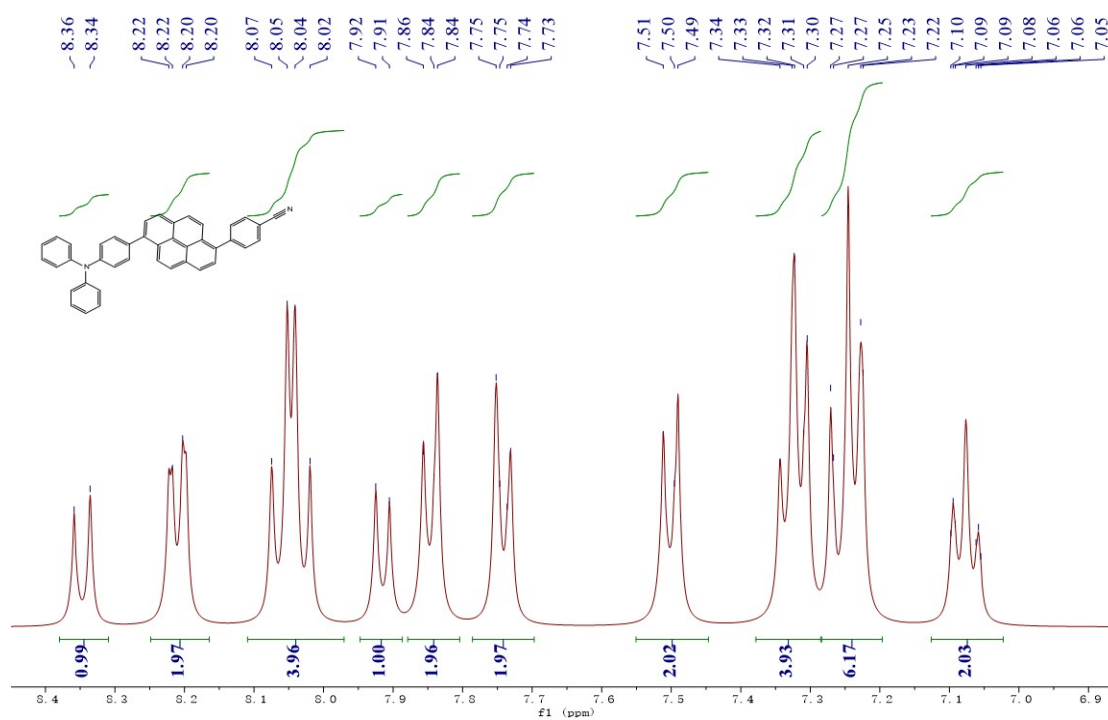

**Figure S2** <sup>1</sup>H NMR spectra of TPAPyCP

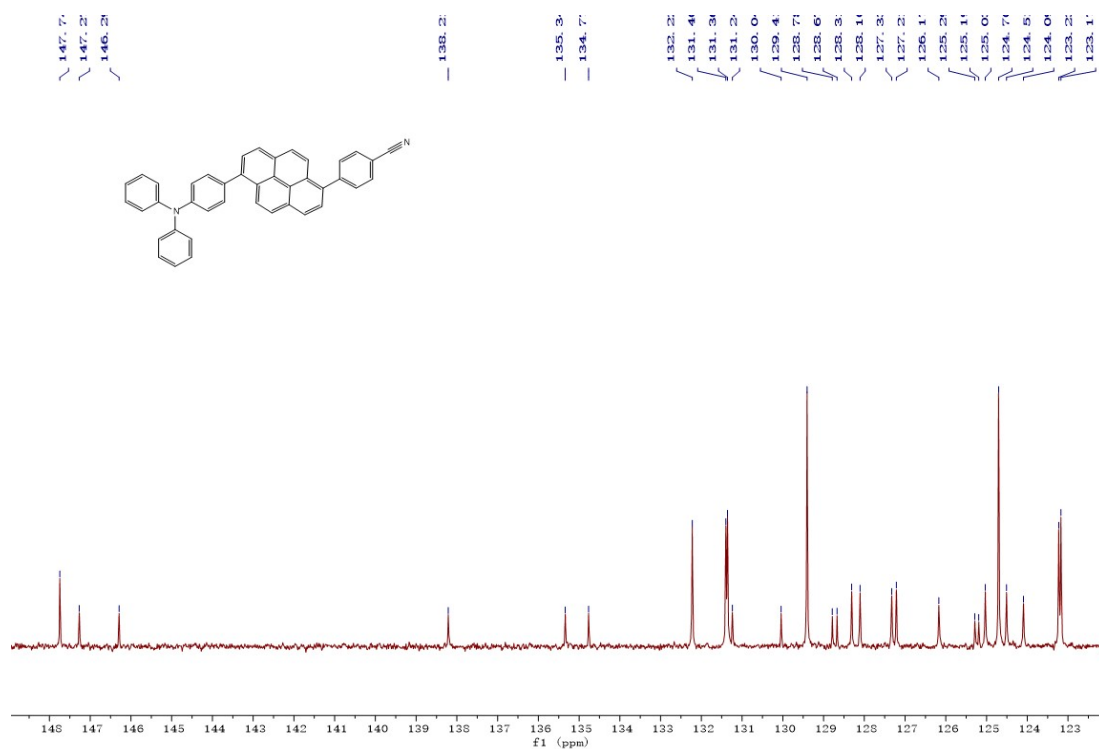

**Figure S3** <sup>13</sup>C NMR spectra of TPAPyCP

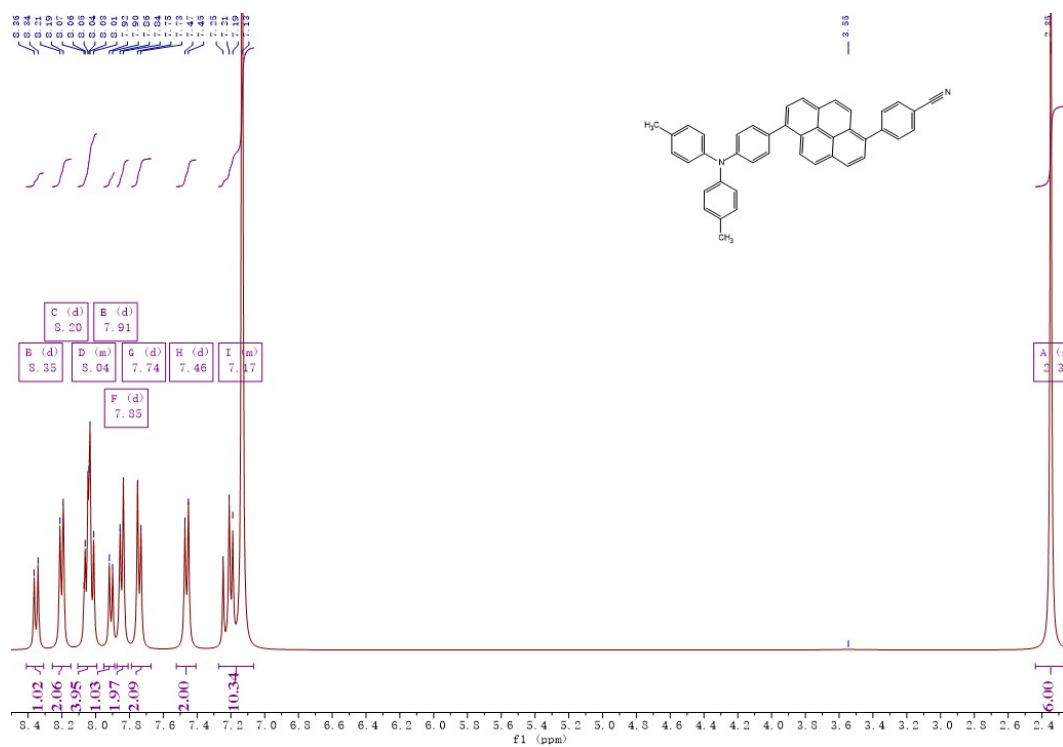

**Figure S4** <sup>1</sup>H NMR spectra of 2mTPAPyCP

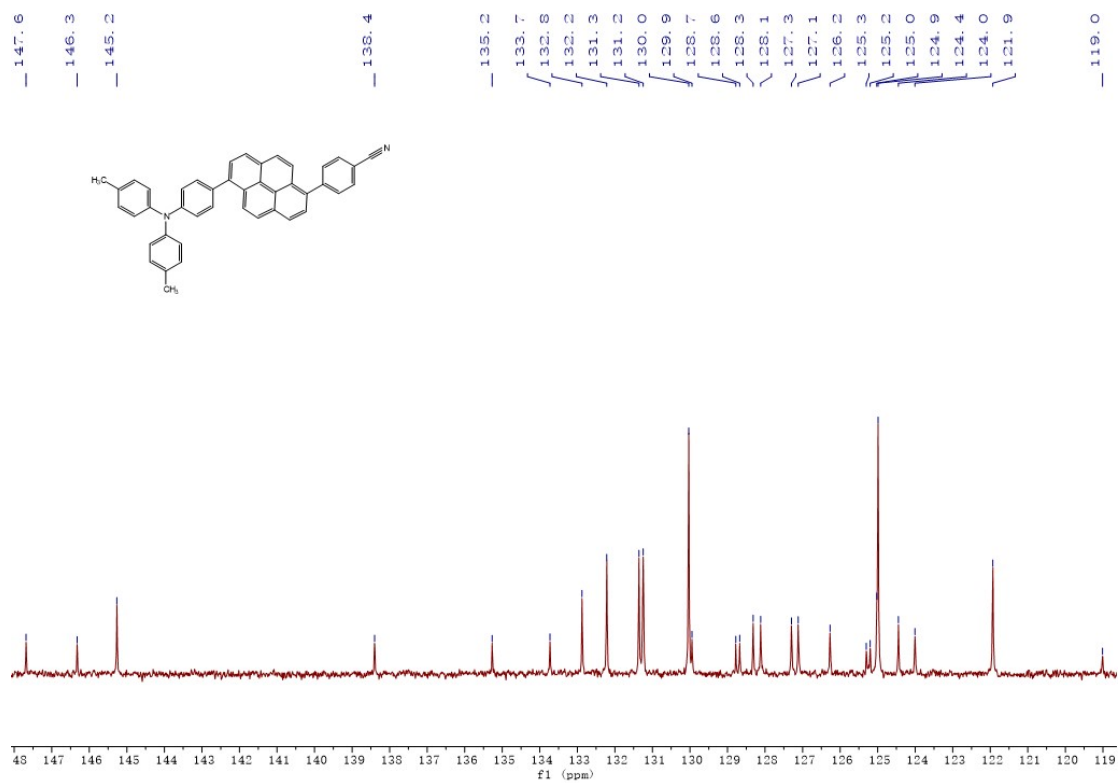

**Figure S5** <sup>13</sup>C NMR spectra of 2mTPAPyCP

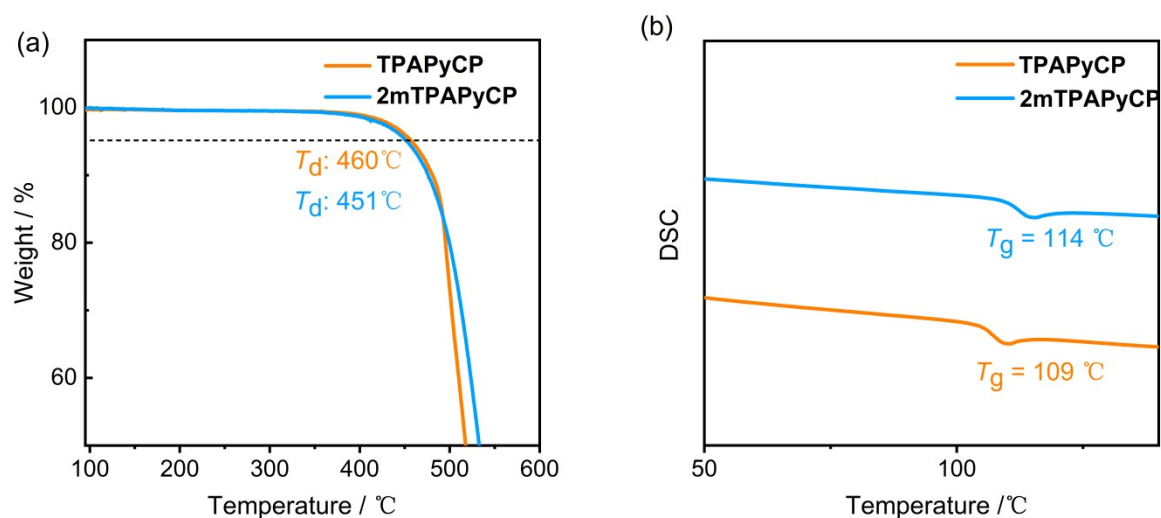

**Figure S6** TGA and DSC curves of TPAPyCP (a) and 2mTPAPyCP (b)

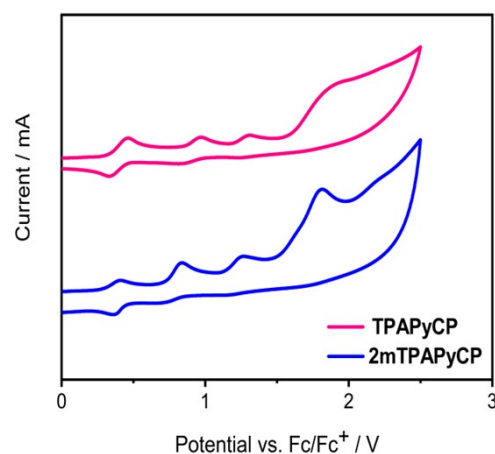

**Figure S7** CV curves of TPAPyCP and 2mTPAPyCP

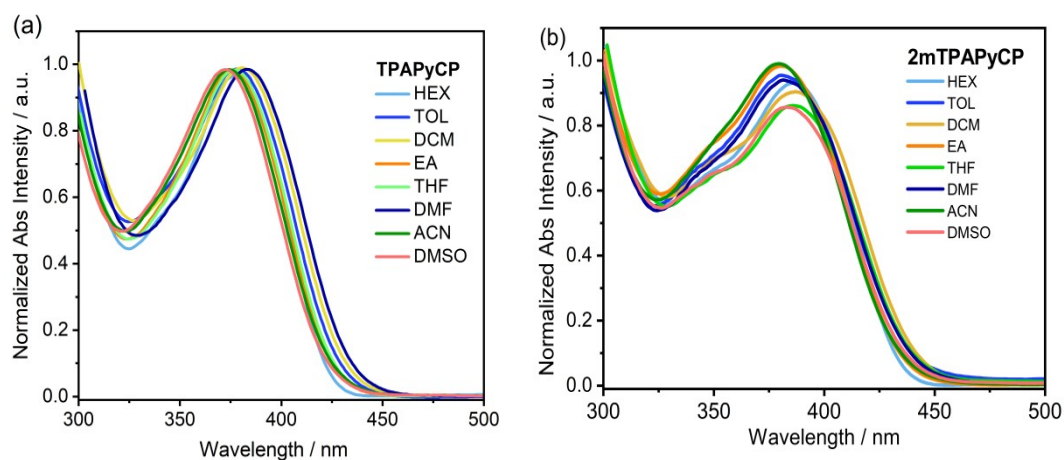

**Figure S8** UV-Vis spectra of TPAPyCP (a) and 2mTPAPyCP (b) in different solvents

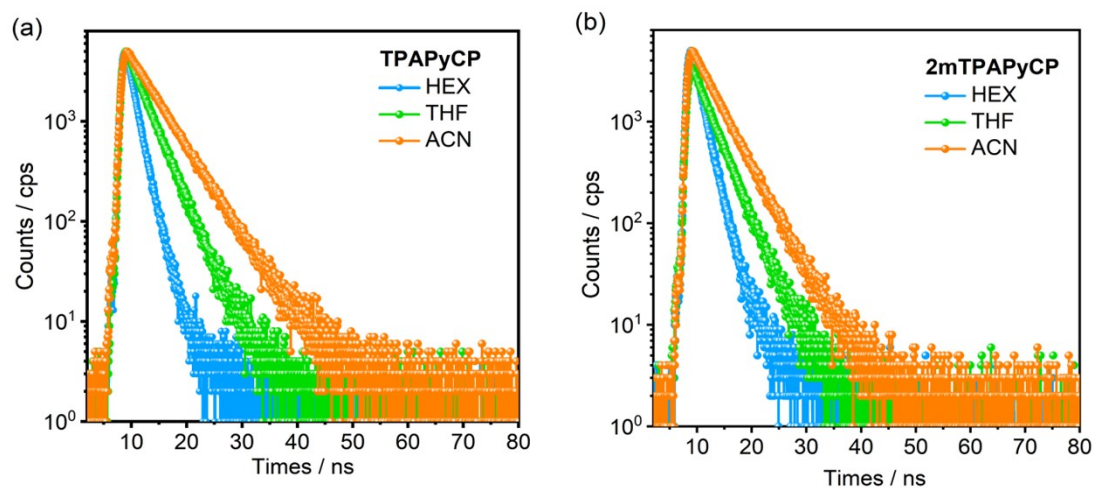

**Figure S9** Transient decay curves of TPAPyCP (a) ; 2mTPAPyCP (b) in n-hexane, tetrahydrofuran and acetonitrile

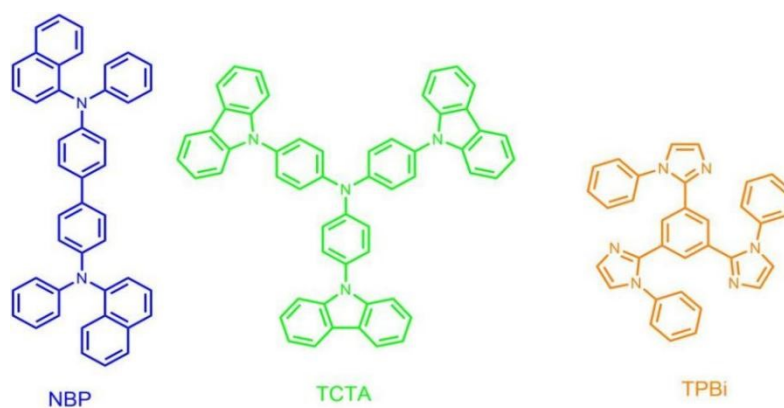

**Figure S10** Molecular structures used in non-doped OLEDs

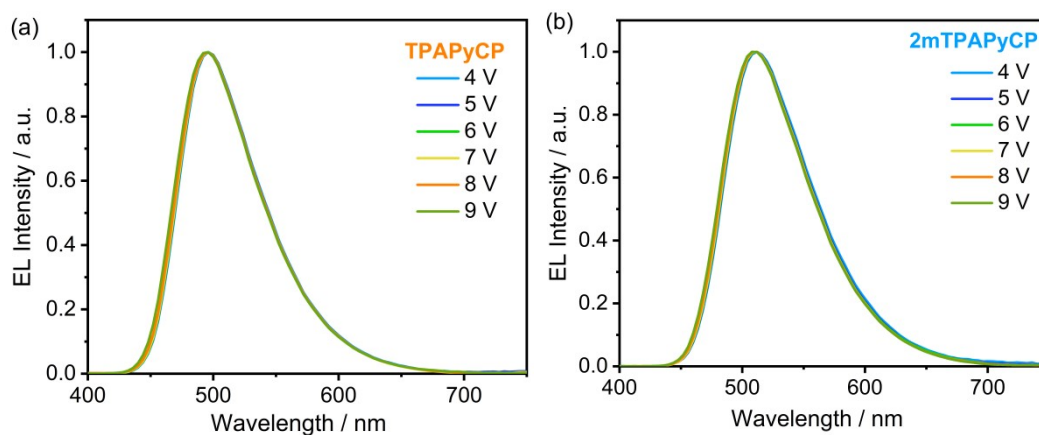

**Figure S11** EL spectra at different voltages of TPAPyCP (a) and 2mTPAPyCP (b) based-devices

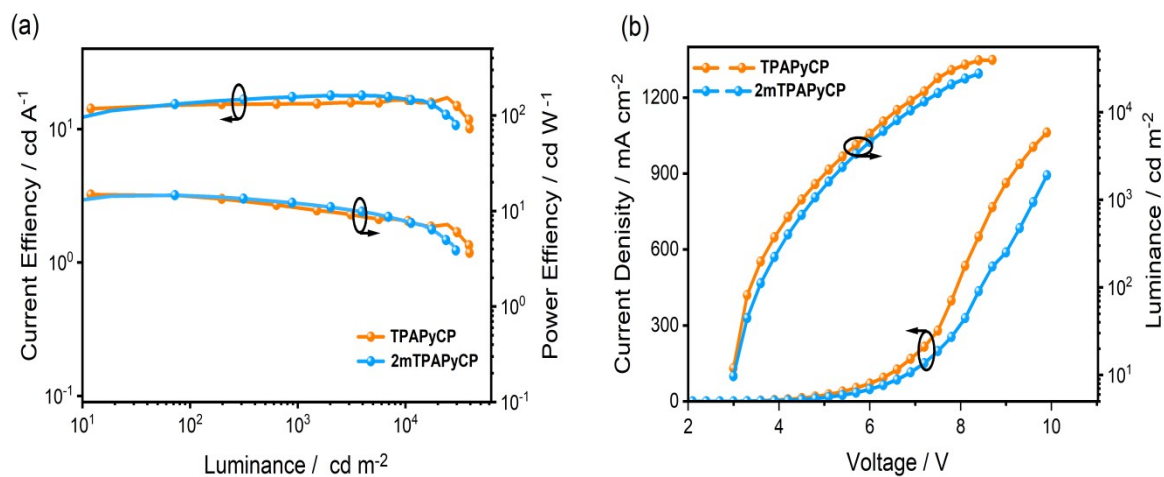

**Figure S12** The CE-L-PE (a) and J-V-L (b) curves of non-doped devices based on **TPAPyCP** and **2mTPAPyCP**

## Supporting Tables

Table S1. Single crystal structural parameters of **2mTPAPyCP**

| Identification code                       | <b>2mTPAPyCP</b>                               |
|-------------------------------------------|------------------------------------------------|
| Empirical formula                         | C <sub>43</sub> H <sub>30</sub> N <sub>2</sub> |
| Formula weight                            | 574.69                                         |
| Temperature/K                             | 150.00(10)                                     |
| Crystal system                            | triclinic                                      |
| Space group                               | P-1                                            |
| a/Å                                       | 7.6245(8)                                      |
| b/Å                                       | 11.3457(11)                                    |
| c/Å                                       | 18.9104(16)                                    |
| $\alpha$ /°                               | 98.867(7)                                      |
| $\beta$ /°                                | 96.371(8)                                      |
| $\gamma$ /°                               | 104.220(9)                                     |
| Volume/Å <sup>3</sup>                     | 1547.7(3)                                      |
| Z                                         | 2                                              |
| $\rho_{\text{calc}}$ g/cm <sup>3</sup>    | 1.233                                          |
| $\mu$ /mm <sup>-1</sup>                   | 0.071                                          |
| F(000)                                    | 604.0                                          |
| Crystal size /mm <sup>3</sup>             | 0.12×0.11×0.02                                 |
| Radiation                                 | MoK $\alpha$ ( $\lambda$ =0.71073)             |
| 2 $\Theta$ range for data collection/°    | 3.77 to 52.746                                 |
| Index ranges                              | -9≤h≤9, -14≤k≤14, -23≤l≤23                     |
| Reflections collected                     | 22644                                          |
| Independent reflections                   | 6231[R(int)=0.1021, Rsigma=0.1074]             |
| Data/restrains/parameters                 | Goodness-of-fit on F <sup>2</sup>              |
| Final R indexes [ $I \geq 2\sigma(I)$ ]   | R1=0.0693, wR2=0.1559                          |
| Final R indexes [all data]                | R1=0.1451, wR2=0.1898                          |
| Largest diff. peak/hole/e Å <sup>-3</sup> | 0.23/-0.24                                     |

**Table S2** Electrochemical and Photophysical Properties of **TPAPyCP** and **2mTPAPyCP**

| Compound  | $\lambda_{\text{abs}}$ (nm) |                   | $\lambda_{\text{pl}}$ (nm) |                   | PLQY <sup>c</sup> | $k_r$                           | $k_{\text{RISC}}$               |
|-----------|-----------------------------|-------------------|----------------------------|-------------------|-------------------|---------------------------------|---------------------------------|
|           | Solution <sup>a</sup>       | Film <sup>b</sup> | Solution <sup>a</sup>      | Film <sup>b</sup> | (%)               | ( $\times 10^8 \text{s}^{-1}$ ) | ( $\times 10^8 \text{s}^{-1}$ ) |
| TPAPyCP   | 300, 377                    | 300, 388          | 478                        | 511               | 73.2              | 2.90                            | 9.53                            |
| 2mTPAPyCP | 300, 385                    | 300, 388          | 488                        | 522               | 65.8              | 2.05                            | 7.91                            |

<sup>a</sup>10<sup>-5</sup> mol/L concentration solution at room temperature; <sup>b</sup>in neat film at room temperature; <sup>c</sup> absolute photoluminescence quantum yield in neat thin film at room temperature.
